# Supplementary material for: Effects of Fish Oil Supplementation on Reducing the Effects of Paternal Obesity and Preventing Fatty Liver in Offspring
Source: MDPI journal article supplement (doi:10.3390/nu15245038), 2023-12-08
Supplement: s1 [file s1]

*Supplemental Table 1: Diet Composition*

|                                               | <b>Control- Low Fat</b> |             | <b>High Fat</b> |             | <b>High Fat – Fish Oil</b> |             |
|-----------------------------------------------|-------------------------|-------------|-----------------|-------------|----------------------------|-------------|
|                                               | gm%                     | kcal%       | gm%             | kcal%       | gm%                        | kcal%       |
| Protein                                       | 28                      | 28.5        | 34              | 28.5        | 34                         | 28.5        |
| Carbohydrate                                  | 57                      | 58.0        | 31              | 27          | 31                         | 27          |
| Fat                                           | 6                       | 13.5        | 24              | 45          | 24                         | 45          |
| Total                                         |                         | 100         |                 | 100         |                            | 100         |
| kcal/gm                                       | 3.92                    |             | 4.7             |             | 4.7                        |             |
| <b>Ingredient</b>                             | <b>gm</b>               | <b>kcal</b> | <b>gm</b>       | <b>kcal</b> | <b>gm</b>                  | <b>kcal</b> |
| Casein, 30 mesh                               | 286.1                   | 1144        | 286             | 1144        | 286                        | 1144        |
| L-Cystine                                     | 3                       | 12          | 3               | 12          | 3                          | 12          |
| Corn Starch                                   | 330                     | 1320        | 11.8            | 47          | 11.8                       | 47          |
| Maltodextrin 10                               | 75                      | 300         | 75              | 300         | 75                         | 300         |
| Sucrose                                       | 172.8                   | 691         | 172.8           | 691         | 172.8                      | 691         |
| Cellulose                                     | 50                      | 0           | 50              | 0           | 50                         | 0           |
| Soybean Oil                                   | 25                      | 225         | 25              | 225         | 25                         | 225         |
| Lard                                          | 36                      | 324         | 177.5           | 1598        | 134.6                      | 1211        |
| MEG-3 Ultra High EPA<br>EE oil (720 mg/g EPA) | 0                       | 0           | 0               | 0           | 42.91                      | 386         |
| Mineral Mix, S10026                           | 10                      | 0           | 10              | 0           | 10                         | 0           |
| DiCalcium Phosphate                           | 13                      | 0           | 13              | 0           | 13                         | 0           |
| Calcium Carbonate                             | 5.5                     | 0           | 5.5             | 0           | 5.5                        | 0           |

|                                       |                |             |               |             |               |             |
|---------------------------------------|----------------|-------------|---------------|-------------|---------------|-------------|
| Potassium Citrate, 1<br>H2O           | 16.5           | 0           | 16.5          | 0           | 16.5          | 0           |
| Vitamin Mix, V10001                   | 10             | 40          | 10            | 40          | 10            | 40          |
| Choline Bitartrate                    | 2              | 0           | 2             | 0           | 2             | 0           |
| Vitamin E Acetate, 50%<br>(500 IU/gm) | 0              | 0           | 0.13          | 0           | 0.13          | 0           |
| FD&C Yellow Dye #5                    | 0              | 0           | 0             | 0           | 0.05          | 0           |
| FD&C Red Dye #40                      | 0.05           | 0           | 0.025         | 0           | 0             | 0           |
| FD&C Blue Dye #1                      | 0              | 0           | 0.025         | 0           | 0             | 0           |
| <b>Total</b>                          | <b>1034.95</b> | <b>4057</b> | <b>858.28</b> | <b>4057</b> | <b>858.29</b> | <b>4057</b> |

*Supplemental Table -2*

| Gene            | Forward                | Reverse                 |
|-----------------|------------------------|-------------------------|
| <i>Acaca</i>    | GCAGCAGTTACACCACATAC   | TCCGCCATCTTCCACAATA     |
| <i>Actin</i>    | TGAGACCTTCAACACCCAGCCA | CGTAGATGGGCACAGTGTGGGTG |
| <i>Cd36</i>     | AGGTCTATCTACGCTGTGTTC  | AGGCATTGGCTGGAAGAA      |
| <i>Cpt-1</i>    | AAGGAATGCAGGTCCACATC   | CCAGGCTACAGTGGGACATT    |
| <i>Cpt-2</i>    | GACCAGTGAGAACCGAGAT    | AAGCAGAGGCAGAAGACA      |
| <i>Dgat2</i>    | TCCAGAAGAAGTCCAGAAGTAT | CAGGTGTCAGAGGAGAAGAG    |
| <i>Fasn</i>     | GTCGTCTATACCACTGCTTACT | ACACCACCTGAACCTGAG      |
| <i>Foxo1</i>    | GCTCTGTCCTGAAGAATCCT   | CTAATCCTGCCACTGTCTGTA   |
| <i>G6Pase</i>   | AACGCCTTCTATGTCCTCTTTC | GTTGCTGTAGTAGTCGGTGTCC  |
| <i>IL-6</i>     | TCAGGTCAGCAATCACAGA    | ACAGGTCTGTTGGGAGTGGT    |
| <i>mTOR</i>     | CAGCAACAGTGAGAGTGAAG   | ACAAGGAGATAGAACGGAAGAA  |
| <i>Pdk4</i>     | TGTGATGTGGTAGCAGTAGT   | TGGTGAAGGTGTGAAGGA      |
| <i>Ppar-g</i>   | ACGATCTGCCTGAGGTCTGT   | CATCGAGGACATCCAAGACA    |
| <i>Srebp-1c</i> | TCTGCCTTGATGAAGTGTGG   | AGCAGCCCCTAGAACAAACA    |
| <i>Tnf-α</i>    | TCTCAAACT CGAGTGACAAGC | GGTTGTCTTTGAGA TCCATGC  |

Supplemental Table 3: F value for ANOVA analyses (F (DFn, DFd))

|               | Diet (D)            | Sex (S)             | Interactions (S x D) |
|---------------|---------------------|---------------------|----------------------|
| Il-6          | F (2, 43) = 9.327   | F (1, 43) = 86.92   | F (2, 43) = 13.19    |
| Tnf- $\alpha$ | F (2, 48) = 0.06081 | F (1, 48) = 0.01553 | F (2, 48) = 5.211    |
| Cd36          | F (2, 43) = 0.7460  | F (1, 43) = 9.770   | F (2, 43) = 8.581    |
| Fasn          | F (2, 37) = 6.446   | F (1, 37) = 32.45   | F (2, 37) = 4.537    |
| Acaca         | F (2, 45) = 3.261   | F (1, 45) = 49.90   | F (2, 45) = 6.259    |
| Srebp-1c      | F (2, 43) = 9.825   | F (1, 43) = 7.552   | F (2, 43) = 3.264    |
| Dgat2         | F (2, 39) = 4.253   | F (1, 39) = 0.7363  | F (2, 39) = 1.680    |
| Cpt-1         | F (2, 41) = 2.884   | F (1, 41) = 2.301   | F (2, 41) = 1.498    |
| Cpt-2         | F (2, 48) = 1.296   | F (1, 48) = 29.37   | F (2, 48) = 3.046    |
| Ppar-g        | F (2, 41) = 1.646   | F (1, 41) = 0.1245  | F (2, 41) = 5.690    |
| Foxo-1        | F (2, 43) = 5.488   | F (1, 43) = 0.3234  | F (2, 43) = 0.1721   |
| G6Pase        | F (2, 49) = 1.607   | F (1, 49) = 4.042   | F (2, 49) = 1.383    |
| mTOR          | F (2, 50) = 0.02635 | F (1, 50) = 14.00   | F (2, 50) = 7.370    |
| Pdk4          | F (2, 33) = 1.249   | F (1, 33) = 23.98   | F (2, 33) = 7.471    |
